# Supplementary material for: Hyperbranched Polyelectrolyte Copolymers as Novel Candidate Delivery Systems for Bio-Relevant Compounds
Source: MDPI journal article supplement (doi:10.3390/ma16031045), 2023-01-24
Supplement: s1 [file s1]

# Hyperbranched Polyelectrolyte Copolymers as Novel Candidate Delivery Systems for Bio-Relevant Compounds

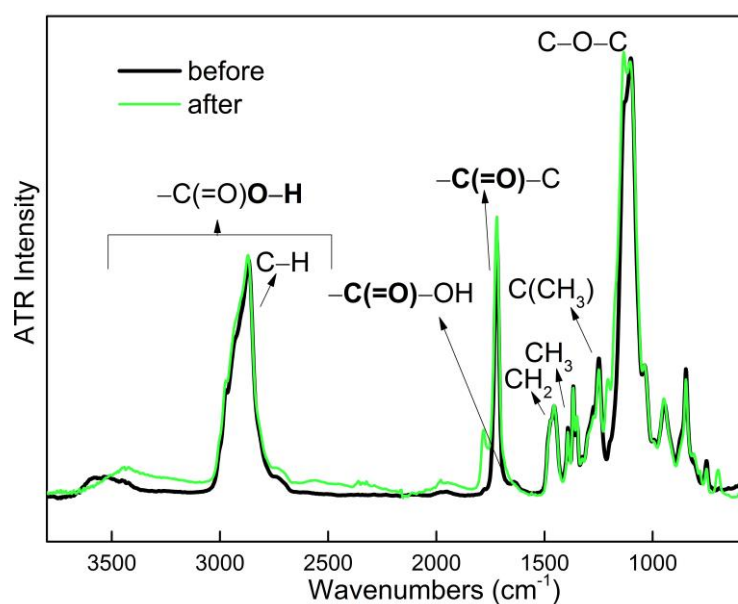

Figure S1. FT-IR spectra of HC 1 before and after hydrolysis.

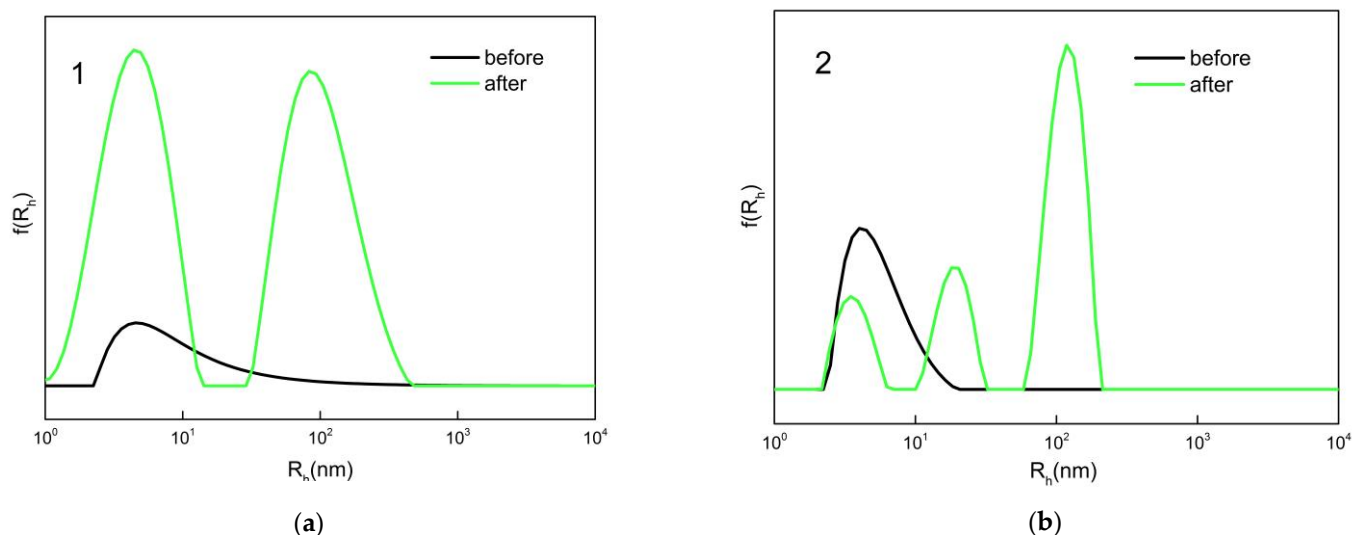

Figure S2. Size distributions of HC 1 (a) and HC 2 (b) in THF solution, before and after hydrolysis, at  $c = 10^{-2}$  g/ml obtained by DLS.

**Table S1.** DLS results for the HCs before and after hydrolysis in THF ( $c = 10^{-2}$ g/ml).

| HC                     | $I_{90^\circ}$ (a.u.) | $R_h$ (nm)                   | PDI  |
|------------------------|-----------------------|------------------------------|------|
| HC 1 before hydrolysis | 60                    | 9                            | 0.54 |
| HC 1 after hydrolysis  | 68                    | 98 (46%)/ 3 (54%)            | 0.48 |
| HC 2 before hydrolysis | 80                    | 5                            | 0.57 |
| HC 2 after hydrolysis  | 218                   | 3 (15%)/ 18 (20%)/ 116 (63%) | 0.53 |

### Stability studies

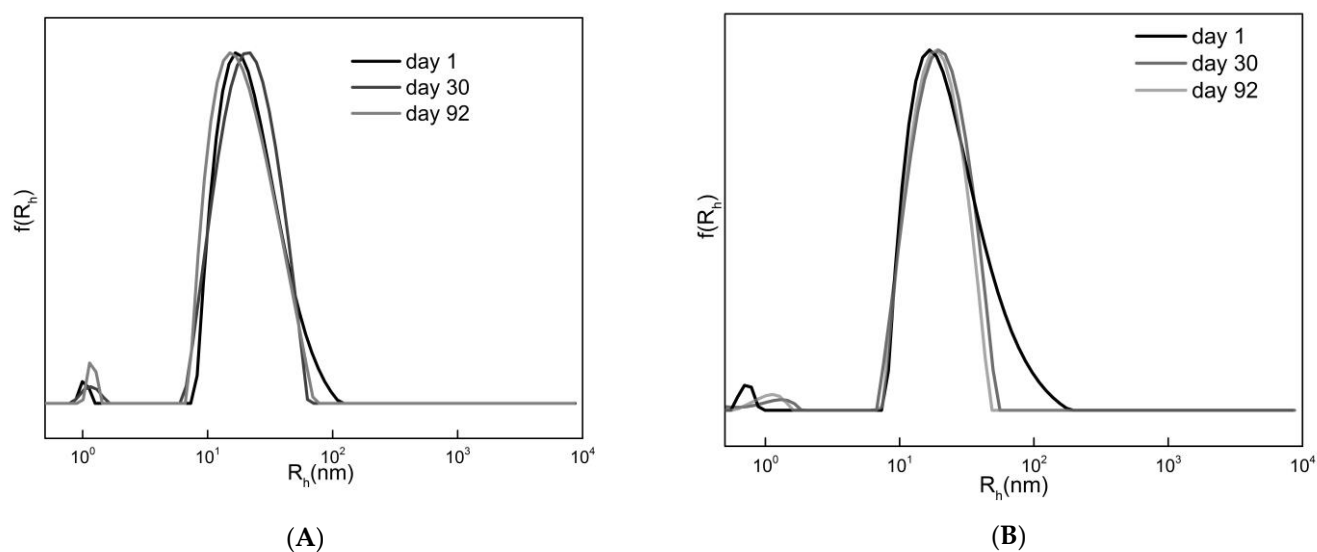**Figure S3.** Size distributions from DLS measurements of sample HC: Lys=1:1 (A) and HC: Lys=1:2(B) of series (c), within a period of three months.**Table S2.** DLS analysis of sample HC: Lys=1:1 and HC: Lys=1:2 of series (c), within a period of three months.

| Sample          | Time   | $I_{90^\circ}$ (a.u.) | $R_h$ (nm) | PDI  |
|-----------------|--------|-----------------------|------------|------|
| (c) HC: Lys=1:2 | Day 1  | 276                   | 23         | 0.30 |
|                 | Day 30 | 207                   | 20         | 0.28 |
|                 | Day 92 | 220                   | 19         | 0.27 |
| (c) HC: Lys=1:1 | Day 1  | 275                   | 22         | 0.27 |
|                 | Day 30 | 252                   | 21         | 0.27 |
|                 | Day 92 | 237                   | 19         | 0.28 |

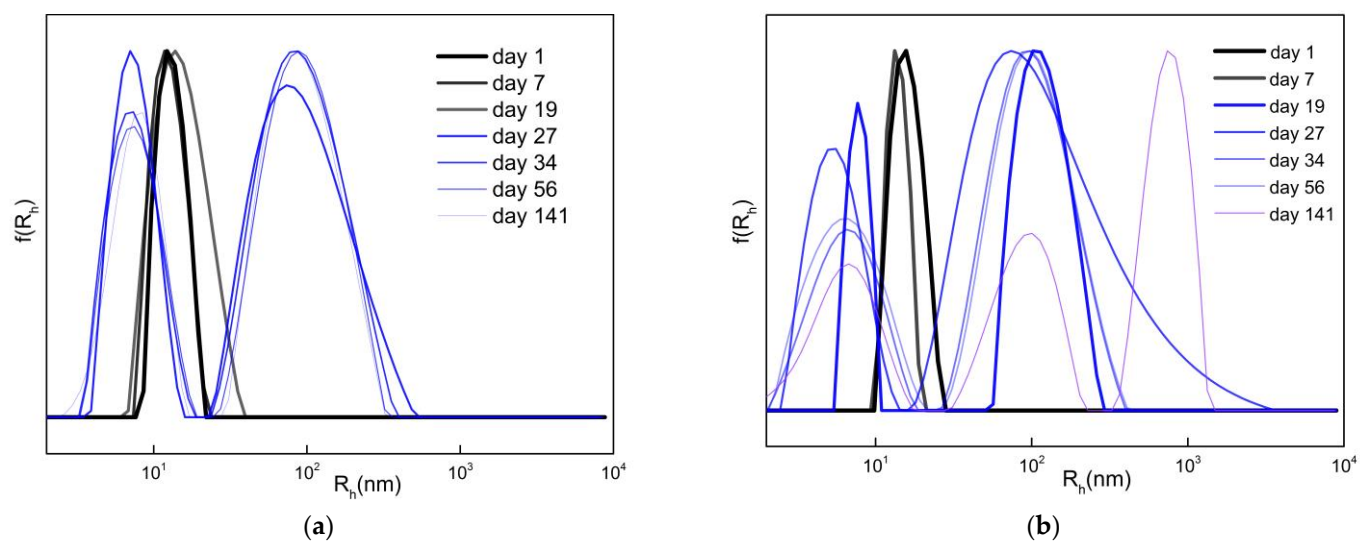

**Figure S4.** Size distributions from DLS measurements of samples HC 1/20% CUR (a) and HC 2/20% CUR (b) within a time period of approximately five months.

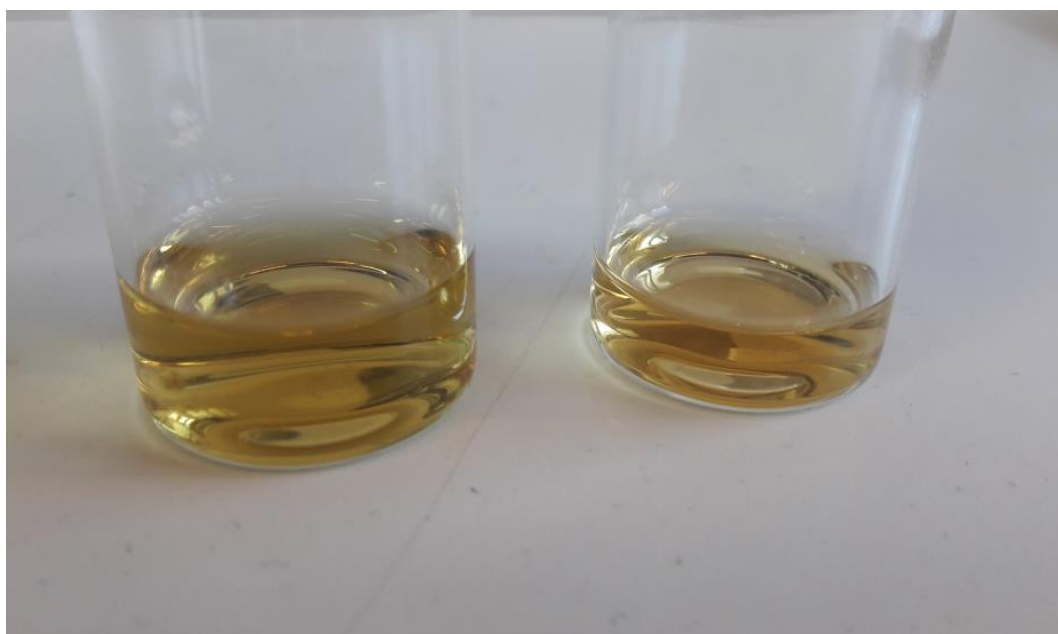

**Figure S5.** Photograph of the HC/CUR mixed NPs in aqueous solutions.

**Table S3.** DLE and DLC values based on UV-Vis absorption measurements.

| Sample        | DLC<br>(wt%) | DLE<br>(wt%) |
|---------------|--------------|--------------|
| HBC 1/CUR 20% | 1.4          | 7.3          |
| HBC 2/CUR 20% | 0.4          | 2.2          |

**Table S4.** DLS analysis of samples HC 1/20% CUR (a) and HC 2/ 20% CUR (b) within a period of approximately five months.

| Sample          | Time    | I <sub>90°</sub> (a.u.) | R <sub>h</sub> (nm)          | PDI  |
|-----------------|---------|-------------------------|------------------------------|------|
| HC 1/20%<br>CUR | Day 1   | 380                     | 13                           | 0.55 |
|                 | Day 7   | 355                     | 12                           | 0.54 |
|                 | Day 19  | 316                     | 15                           | 0.54 |
|                 | Day 27  | 310                     | 92(66%)/ 7(34%)              | 0.51 |
|                 | Day 34  | 315                     | 91(66%)/ 7(34%)              | 0.53 |
|                 | Day 56  | 290                     | 93(65%)/ 8(35%)              | 0.52 |
|                 | Day 141 | 330                     | 91(65%)/ 8(35%)              | 0.52 |
|                 |         |                         |                              |      |
| HC 2/20%<br>CUR | Day 1   | 185                     | 16                           | 0.56 |
|                 | Day 7   | 180                     | 14                           | 0.55 |
|                 | Day 19  | 175                     | 117(71%)/ 8(29%)             | 0.57 |
|                 | Day 27  | 200                     | 119(76%)/ 6(23%)             | 0.53 |
|                 | Day 34  | 225                     | 99(69%)/ 6(31%)              | 0.54 |
|                 | Day 56  | 200                     | 102(66%)/ 6(34%)             | 0.52 |
|                 | Day 141 | 339                     | 731(44%)/ 88(30%)/<br>6(26%) | 0.50 |
|                 |         |                         |                              |      |

**Drug loading content (DLC) and Drug loading efficiency (DLE)**

DLC and DLE for the CUR loaded PNPs were calculated using the equations:

$$\text{DLC (wt\%)} = (\text{weight of loaded drug} / \text{weight of drug-loaded polymer}) \times 100, \quad (\text{S1})$$

$$\text{DLE (wt\%)} = (\text{weight of loaded drug} / \text{weight of initial drug feed}) \times 100, \quad (\text{S2})$$
